# Supplementary material
Source: PubMed Central journal article supplement (PMC4576037)
Supplement: AAC.00933-15_zac010154477so1.pdf [file AAC.00933-15_zac010154477so1.pdf]

## Detailed Materials and Methods

**Subject selection and sample collection.** The study subjects were recruited among the subjects of a larger study in which Swedish students from the universities in Umeå, Stockholm and Gothenburg travelling for international exchange studies as part of their university education were invited to participate from April 2010 through January 2014. The study protocol included responding to questionnaire data and self-submission of fecal specimens before and after travel. Each study subject submitted a fecal swab specimen (Copan Venturi Transystem®, Copan diagnostics Inc. USA) for bacterial culture and a fecal specimen in a half filled 101\*16,5mm plastic collection tube (Faeces tube, Sarstedt, Nümbrecht, Germany) for metagenomic analysis. For the present study, only healthcare students (medical, nursing and dentistry) travelling to the Indian peninsula or to Central Africa and having submitted a full set of fecal specimens qualified for inclusion. None of the subjects included were allowed to have taken antibiotics within six months prior to sampling. The inclusion was consecutive with a target of 15-20 study subjects travelling to each of the two destinations.

Fecal specimens for metagenomics were sent to the lab in the collection tubes, and stored at -20°C upon arrival. DNA extraction was performed using the QIAamp® DNA Stool Mini Kit (QIAGEN) according to the manufacturer's protocol. DNA concentrations were measured using a Qubit instrument, and samples were stored at -20°C before sequencing. Paired-end sequencing libraries (2x100 bp) were prepared using the TrueSeq DNA Kit for multiplexing. Sequencing was done at Science for Life Laboratories (Stockholm, Sweden) using Illumina HiSeq2000 technology. The study was approved by the regional ethical review board in Umeå, Sweden (2011-357-32M).

**Culturing of ESBL-producing bacteria.** Screening for ESBL producing bacteria was done using swab culture on chromogenic media (crohmID ESBL, bioMérieux SA, Marcy-l'Etoile France). All positive isolates were analyzed through culture-based methods according to EUCAST guidelines (<http://www.eucast.org>). The definition of ESBL producing Enterobacteriaceae by Giske *et al.* (1) was used. Antibiotic susceptibility testing (including cefotaxime, ceftazidime, piperacillin/tazobactam and meropenem) was done by disc diffusion (Oxoid Ltd./Thermo Fisher Scientific, Cambridge, United Kingdom) on Mueller-Hinton (MH) agar (Oxoid Ltd.). E-tests® (bioMérieux) were used to test for the presence of ESBL<sub>A</sub> phenotype (detecting the presence of CTX-M, SHV and TEM enzymes) with cefotaxime/cefotaxime + clavulanic acid and ceftazidime/ceftazidime + clavulanic acid as well as cefepime/cefepime+ clavulanic acid if warranted. If applicable, phenotypic detection of AMPc type beta-lactamases with cloxacillin inhibitable ESBL enzymes (cefotetan/cefotetan + cloxacillin) was performed. Since not all carbapenemase-producers show reduced susceptibility to carbapenems, particularly not OXA-48/OXA-181 producers that do not yield an ESBL (2, 3), all post-travel samples of this study (before screening on chromogenic media) were tested by disc diffusion for susceptibility to meropenem (10µg), piperacillin/tazobactam (30µg/6µg) and ceftazidim (10µg) on MH agar (Thermo Scientific) containing 7,5mg/L vancomycin, a modified zone diameter cut-off ( $\geq 16$  mm) for piperacillin-tazobactam was used (4). Resistant Enterobacteriaceae isolates were further tested with temocillin (30 µg, Rosco Diagnostica, Taastrup, Denmark) and our test scheme contained additional analysis by the CT-103 XL microarray (Check-Points Health B.V., Wageningen, The Netherlands) of isolates with reduced sensitivity to temocillin. Phenotypic species identification of ESBL positive Enterobacteriaceae isolates was done using an API® identification system (API-20E, bioMérieux). Species identification of non-Enterobacteriaceae isolates growing on the chromogenic media was performed with MALDI-TOF-MS using a Bruker Daltonics Microflex

LT mass spectrometer and the MALDI-Biotyper 3.0 software (Bruker Daltonik GmbH, Bremen, Germany).

DNA from ESBL-producing strains was extracted using QIAamp® DNA Mini Kit (QIAGEN) according to the manufacturer's protocol. DNA concentrations were measured using a Qubit instrument, and samples were stored at -20°C before sequencing. The samples were sequenced using the Illumina MiSeq instrument (FOI, Umeå), producing 299,202 – 1,575,161 (average 760,896) 250 bp paired-end reads per sample for each library.

**Sequence pre-processing and quality filtering.** FASTQ sequences from both genomes and metagenomes were trimmed with respect to adapters and low-quality nucleotide stretches using TrimGalore! version 0.2.8, [www.bioinformatics.babraham.ac.uk/projects/trim\\_galore/](http://www.bioinformatics.babraham.ac.uk/projects/trim_galore/) with parameter settings “-stringency 6 -q 28”. Host sequences were subsequently removed from the metagenomic data by aligning the trimmed sequences to the hg19 human genome reference assembly using Bowtie2 v. 2.0.2 (5) with parameters “-p 8 -un-conc-gz *OUTFILE*” and discarding those reads that had a valid alignment to it. Trimmed and filtered sequences were used as input for all further analysis, including resistance gene mapping, reference-genome mapping, and *de novo* assembly. Sequence data have been submitted to the European Nucleotide Archive under project accession number PRJEB7369 (<http://www.ebi.ac.uk/ena/data/view/PRJEB7369>).

**Analysis of genomes from isolates.** Filtered and trimmed sequences from the isolated ESBL-producing *Escherichia coli* genomes were assembled using the SPAdes assembler (version 2.5.1) with the additional parameter “-m 32” (6). Resistance genes were identified by matching the assembled

contigs against the Resqu database version 1.1 [www.1928diagnostics.com/resdb](http://www.1928diagnostics.com/resdb) containing 3,019 non-redundant protein sequences corresponding to 325 resistance gene families using blastx (7). See Table S5 for the complete list of genes in Resqu. Only matches longer than 100 bp and with 90% identity or higher were kept. Identified beta-lactam resistance genes were further characterized by BLAST against the entire NCBI protein database, to determine if variants were known or novel.

**rRNA analysis and resistance gene mapping.** Quality filtered read pairs were scanned with Metaxa2 version 2.0 (8) to extract bacterial 16S rRNA (SSU) sequences (additional option “--align none”). In each library, the 16S counts for different genera, families and phyla were normalized to the total number of 16S counts in that library, yielding relative abundances for each organism group. Enterotypes (9) were determined using Principal Component Analysis (PCA) to mainly be driven by the abundances of the *Prevotella* and *Bacteroides* genera, and therefore we defined enterotypes by the ratio of reads mapping to *Prevotella* 16S rRNA sequences and reads mapping to *Bacteroides* 16S rRNA. If the ratio was above one or below one in both the before and after samples from the same individual, the enterotypes was deemed unchanged by travel in that individual. Quality filtered reads were mapped against the Resqu antibiotic resistance gene database using Vmatch (<http://vmatch.de>), allowing two mismatched amino acids per translated read to account for sequencing errors but retain stringency with regards to finding the sought target genes (options “-showdesc 60 -dnvsprot 11 -l 20 -h 2”), and thus avoiding inflation by false positive matches (10). The number of matches to each resistance gene was counted and normalized to the length of the respective gene to avoid bias due to differential length of the resistance genes. The length-normalized numbers were then used for deriving an approximation of the number of resistance genes per 16S rRNA sequence identified by Metaxa2 (see above). The length-normalized numbers were divided by the length of the 16S gene.

***De novo* metagenomic assembly.** *De novo* assembly of the sequences from each sample was performed using Ray Méta (11) on 512 cores of a Cray XE6 system at the PDC Center for High Performance Computing at the Royal Institute of Technology in Stockholm. The k-mer length parameter k was set to 49 based on trials using a range of values in Ray and Velvet (12) assemblies.

**Annotation of assemblies.** Prodigal (13) version 2.60 with parameters “-c -m -p meta” was used to identify open reading frames in assembled contigs and translate those into amino acid sequences. These were subsequently mapped using blastp (in NCBI Blast (7) version 2.2.28+) to the Resque resistance gene database in order to identify contigs containing sequences resembling known resistance genes. Networks of co-localized resistance genes were generated in Cytoscape version 3.0 (14). Contigs were additionally mapped to a reference collection of gastrointestinal microbial genomes to discern taxonomic origin (see below).

**Mapping to reference genomes and contigs.** Quality-filtered reads and assembled contigs were mapped against the Human Microbiome Project (HMP) gastrointestinal\_tract reference genome collection ([http://downloads.hmpdacc.org/data/reference\\_genomes/body\\_sites/Gastrointestinal\\_tract.nuc.fsa](http://downloads.hmpdacc.org/data/reference_genomes/body_sites/Gastrointestinal_tract.nuc.fsa)) using Burrows-Wheeler Aligner, bwa (15), version 0.7.5a with the “mem” subcommand. Reads from all libraries were also mapped back to the total collection of contigs from all samples using Bowtie2 (v. 2.0.2) to estimate their abundance in different libraries.

Statistical testing. Resistance gene copies per bacterial 16S rRNA counts were log-transformed by adding a number corresponding to the smallest relative abundance for any detected gene across all samples, and significant changes of average abundances between before and after samples were assessed using paired Student's t-tests. Wilcoxon signed-rank test was used as a complement to find genes with changed median abundance. All p-values were corrected for multiple testing using a Benjamini-Hochberg False Discovery Rate (FDR) and genes with an FDR <0.05 were considered significant (16). The same procedure was adapted for resistance gene categories. Changes in normalized log-transformed relative abundances of taxonomic groups were similarly tested using paired Student's t-tests and tests with an FDR of <0.05 were considered significant. Contigs with significantly different abundance between the groups of travelers returning from the Indian peninsula and Africa were identified using the Limma package (17). Correlations between resistance gene abundances and other factors (gender, age, length of visit, time between return from trip and sample delivery, health care work, sickness during travel, diarrhea, malaria prophylaxis and ESBL culturing results) were assessed using linear regression in the R statistical program (<http://www.r-project.org>). The p-values for each coefficient were corrected for multiple testing and tests with an FDR <0.05 were considered significant.

## References

1. **Giske CG, Sundsfjord AS, Kahlmeter G, Woodford N, Nordmann P, Paterson DL, Cantón R, Walsh TR.** 2009. Redefining extended-spectrum beta-lactamases: balancing science and clinical need. *J Antimicrob Chemother* **63**:1–4.
2. **Nordmann P, Gniadkowski M, Giske CG, Poirel L, Woodford N, Miriagou V, European Network on Carbapenemases.** 2012. Identification and screening of carbapenemase-producing Enterobacteriaceae. *Clin Microbiol Infect* **18**:432–438.
3. **Nordmann P, Naas T, Poirel L.** 2011. Global spread of Carbapenemase-producing Enterobacteriaceae. *Emerging Infect Dis* **17**:1791–1798.
4. **Huang T-D, Poirel L, Bogaerts P, Berhin C, Nordmann P, Glupczynski Y.** 2014. Temocillin and piperacillin/tazobactam resistance by disc diffusion as antimicrobial surrogate markers for the detection of carbapenemase-producing Enterobacteriaceae in geographical areas with a high prevalence of OXA-48 producers. *J Antimicrob Chemother* **69**:445–450.
5. **Langmead B, Salzberg SL.** 2012. Fast gapped-read alignment with Bowtie 2. *Nat Methods* **9**:357–359.
6. **Bankevich A, Nurk S, Antipov D, Gurevich AA, Dvorkin M, Kulikov AS, Lesin VM, Nikolenko SI, Pham S, Pribelski AD, Pyshkin AV, Sirotkin AV, Vyahhi N, Tesler G, Alekseyev MA, Pevzner PA.** 2012. SPAdes: a new genome assembly algorithm and its applications to single-cell sequencing. *J Comput Biol* **19**:455–477.
7. **Altschul SF, Madden TL, Schäffer AA, Zhang J, Zhang Z, Miller W, Lipman DJ.** 1997. Gapped BLAST and PSI-BLAST: a new generation of protein database search programs. *Nucleic Acids Res* **25**:3389–3402.
8. **Bengtsson-Palme J, Hartmann M, Eriksson KM, Pal C, Thorell K, Larsson DGJ, Nilsson RH.** 2015. Metaxa2: Improved Identification and Taxonomic Classification of Small and Large Subunit rRNA in Metagenomic Data. *Mol Ecol Resour.*
9. **Arumugam M, Raes J, Pelletier E, Le Paslier D, Yamada T, Mende DR, Fernandes GR, Tap J, Bruls T, Batto J-M, Bertalan M, Borrueal N, Casellas F, Fernandez L, Gautier L, Hansen T, Hattori M, Hayashi T, Kleerebezem M, Kurokawa K, Leclerc M, Levenez F, Manichanh C, Nielsen HB, Nielsen T, Pons N, Poulain J, Qin J, Sicheritz-Ponten T, Tims S, Torrents D, Ugarte E, Zoetendal EG, Wang J, Guarner F, Pedersen O, de Vos WM, Brunak S, Dore J, MetaHIT Consortium, Antolín M, Artiguenave F, Blottiere HM, Almeida M, Brechot C, Cara C, Chervaux C, Cultrone A, Delorme C, Denariáz G, Dervyn R, Foerstner KU, Friss C, van de Guchte M, Guedon E, Haimet F, Huber W, van Hylckama-Vlieg J, Jamet A, Juste C, Kaci G, Knol J, Lakhdari O, Layec S, Le Roux K, Maguin E, Mérieux A, Melo Minardi R, M'rini C, Muller J, Oozeer R, Parkhill J, Renault P, Rescigno M, Sanchez N, Sunagawa S, Torrejon A, Turner K, Vandemeulebrouck G, Varela E, Winogradsky Y, Zeller G, Weissenbach J, Ehrlich SD, Bork P.** 2011. Enterotypes of the human gut microbiome. *Nature* **473**:174–180.
10. **Martinez JL, Coque TM, Baquero F.** 2015. What is a resistance gene? Ranking risk in resistomes. *Nat Rev Microbiol* **13**:116–123.
11. **Boisvert S, Raymond F, Godzaridis E, Laviolette F, Corbeil J.** 2012. Ray Meta: scalable de novo metagenome assembly and profiling. *Genome Biol* **13**:R122.
12. **Zerbino DR, Birney E.** 2008. Velvet: algorithms for de novo short read assembly using de Bruijn graphs. *Genome Res* **18**:821–829.

13. **Hyatt D, Chen G-L, LoCascio PF, Land ML, Larimer FW, Hauser LJ.** 2010. Prodigal: prokaryotic gene recognition and translation initiation site identification. *BMC Bioinformatics* **11**:119.
14. **Shannon P, Markiel A, Ozier O, Baliga NS, Wang JT, Ramage D, Amin N, Schwikowski B, Ideker T.** 2003. Cytoscape: a software environment for integrated models of biomolecular interaction networks. *Genome Res* **13**:2498–2504.
15. **Li H, Durbin R.** 2010. Fast and accurate long-read alignment with Burrows-Wheeler transform. *Bioinformatics* **26**:589–595.
16. **Benjamini Y, Hochberg Y.** 1995. Controlling the false discovery rate: a practical and powerful approach to multiple testing. *J R Stat Soc Series B (Methodological)* **57**:289–300.
17. **Law CW, Chen Y, Shi W, Smyth GK.** 2014. Voom: precision weights unlock linear model analysis tools for RNA-seq read counts. *Genome Biol* **15**:R29.



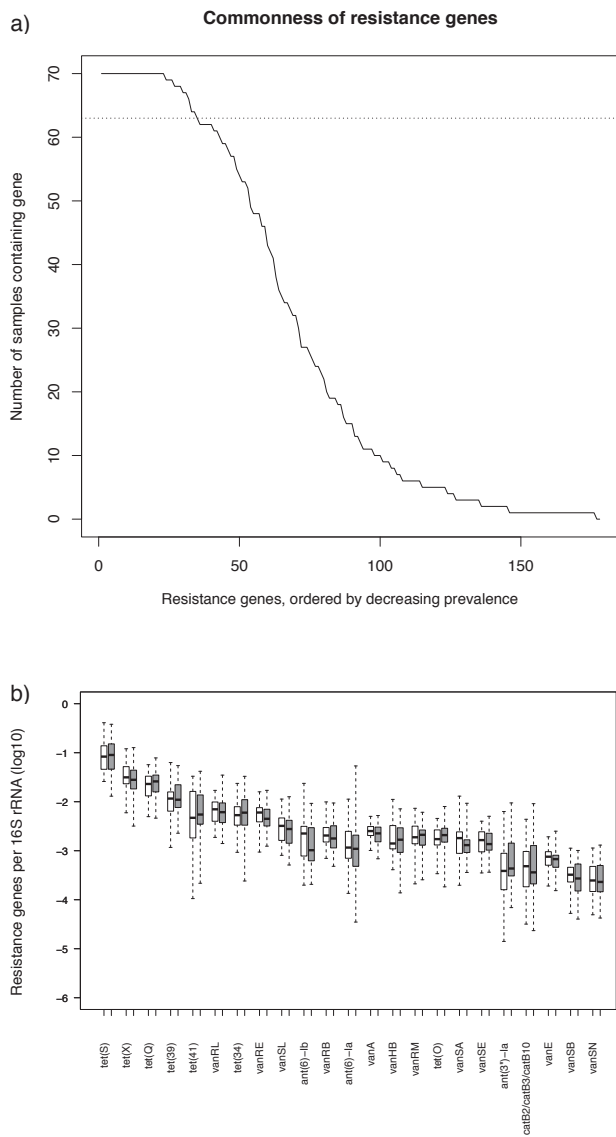

**Figure S1.** The core resistome of the cohort. a) The number of samples containing a certain resistance gene. b) Abundance of the resistance genes detected in all samples (log 10 scale).

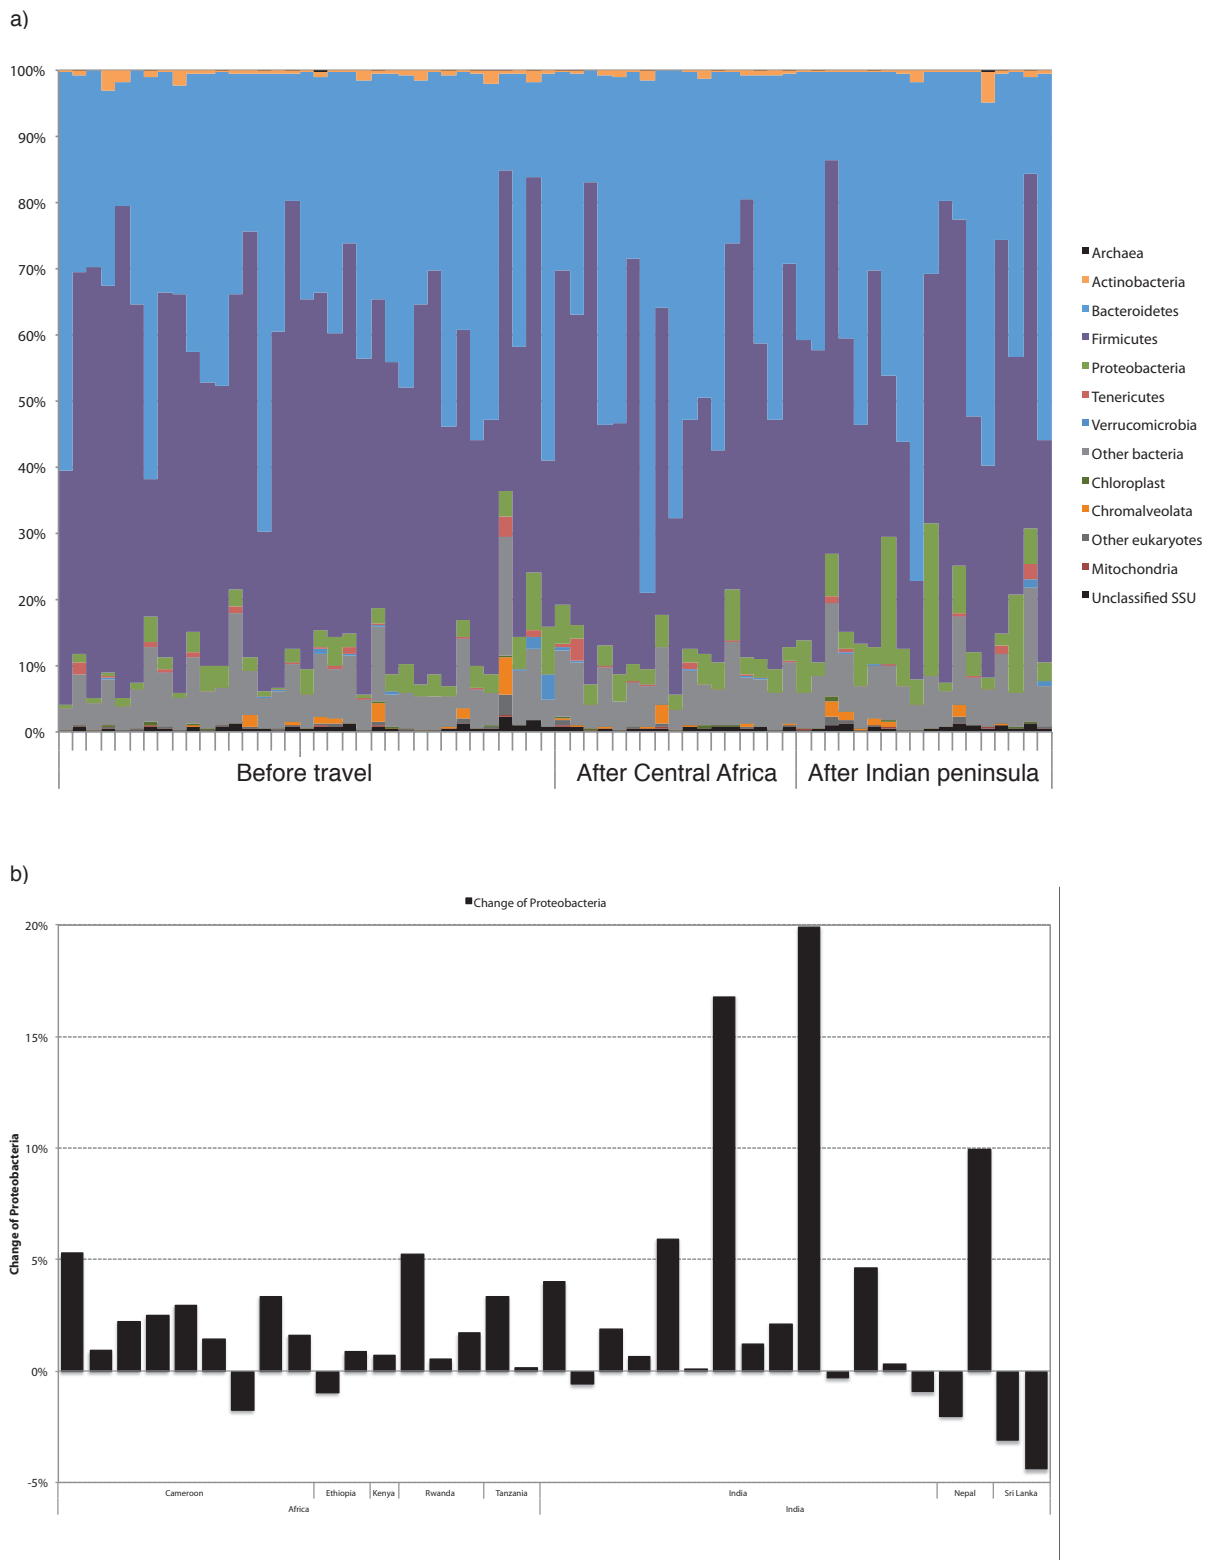

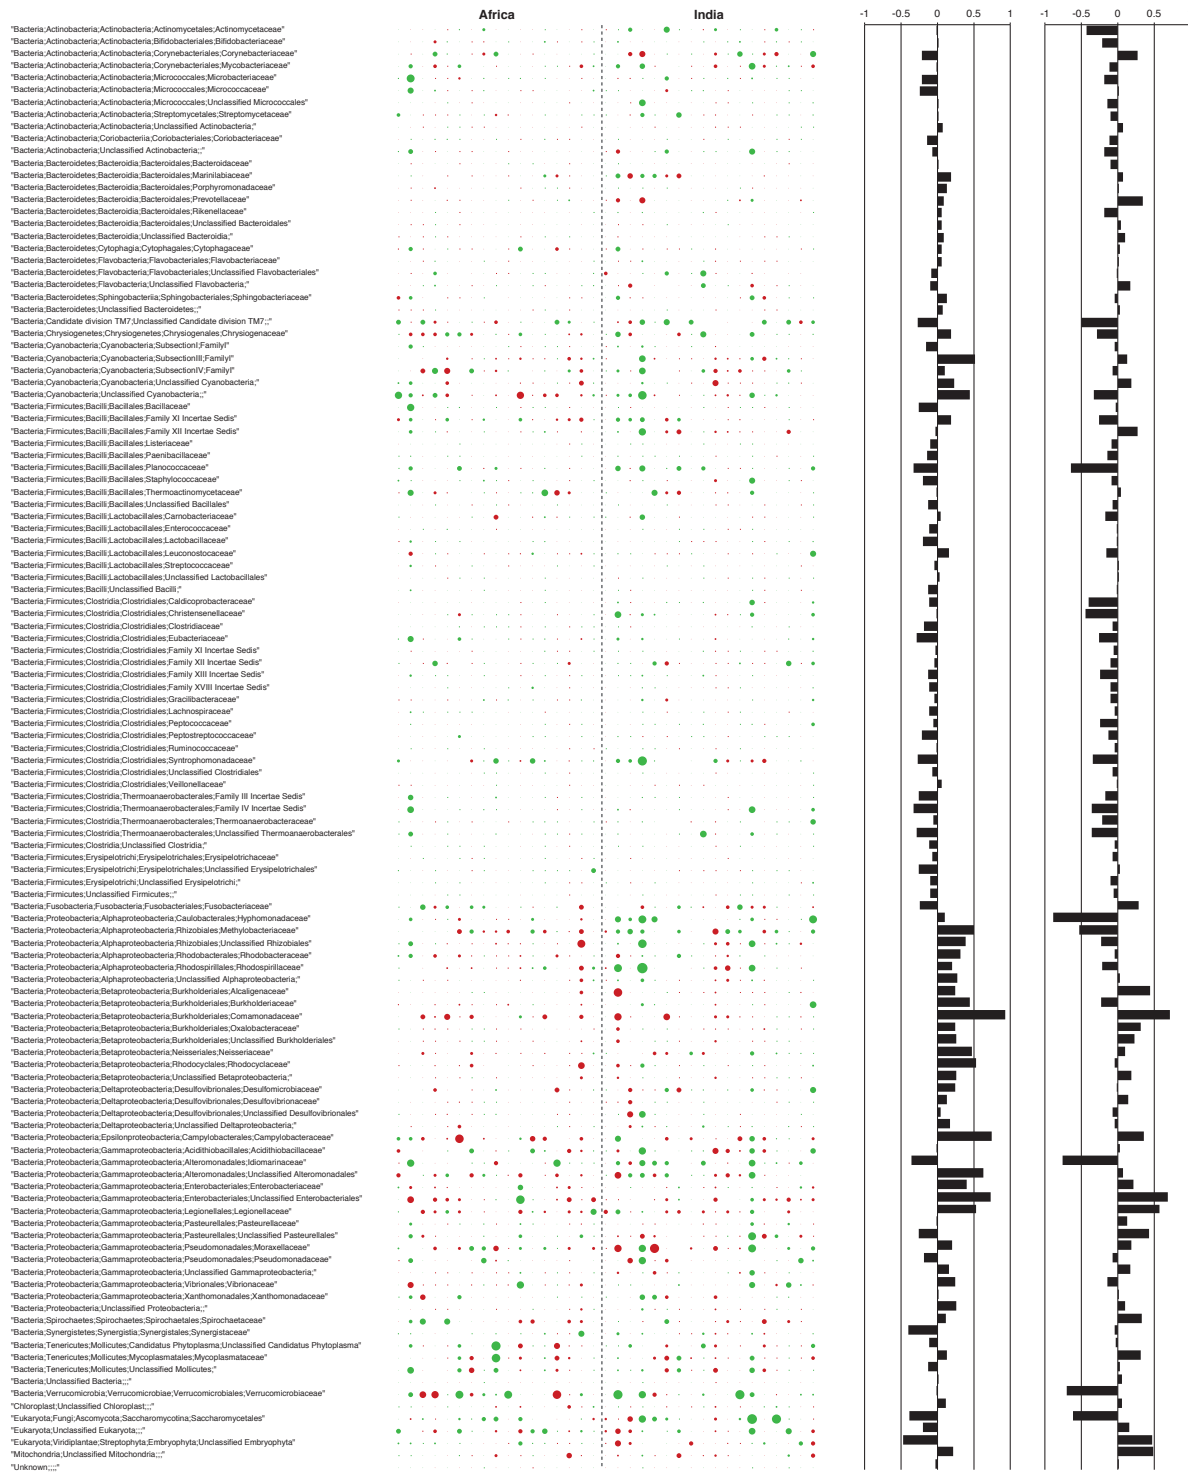

**Figure S3.** Changes of the most abundant taxonomic families, for each individual. The diameter of each dot represents the magnitude of change in that individual (log<sub>10</sub> scale). Green color indicates decreases and red color indicates increases. To the right, the mean fold changes across all individuals traveling to central Africa (left) and the Indian peninsula (right) are shown (log<sub>10</sub> scale).

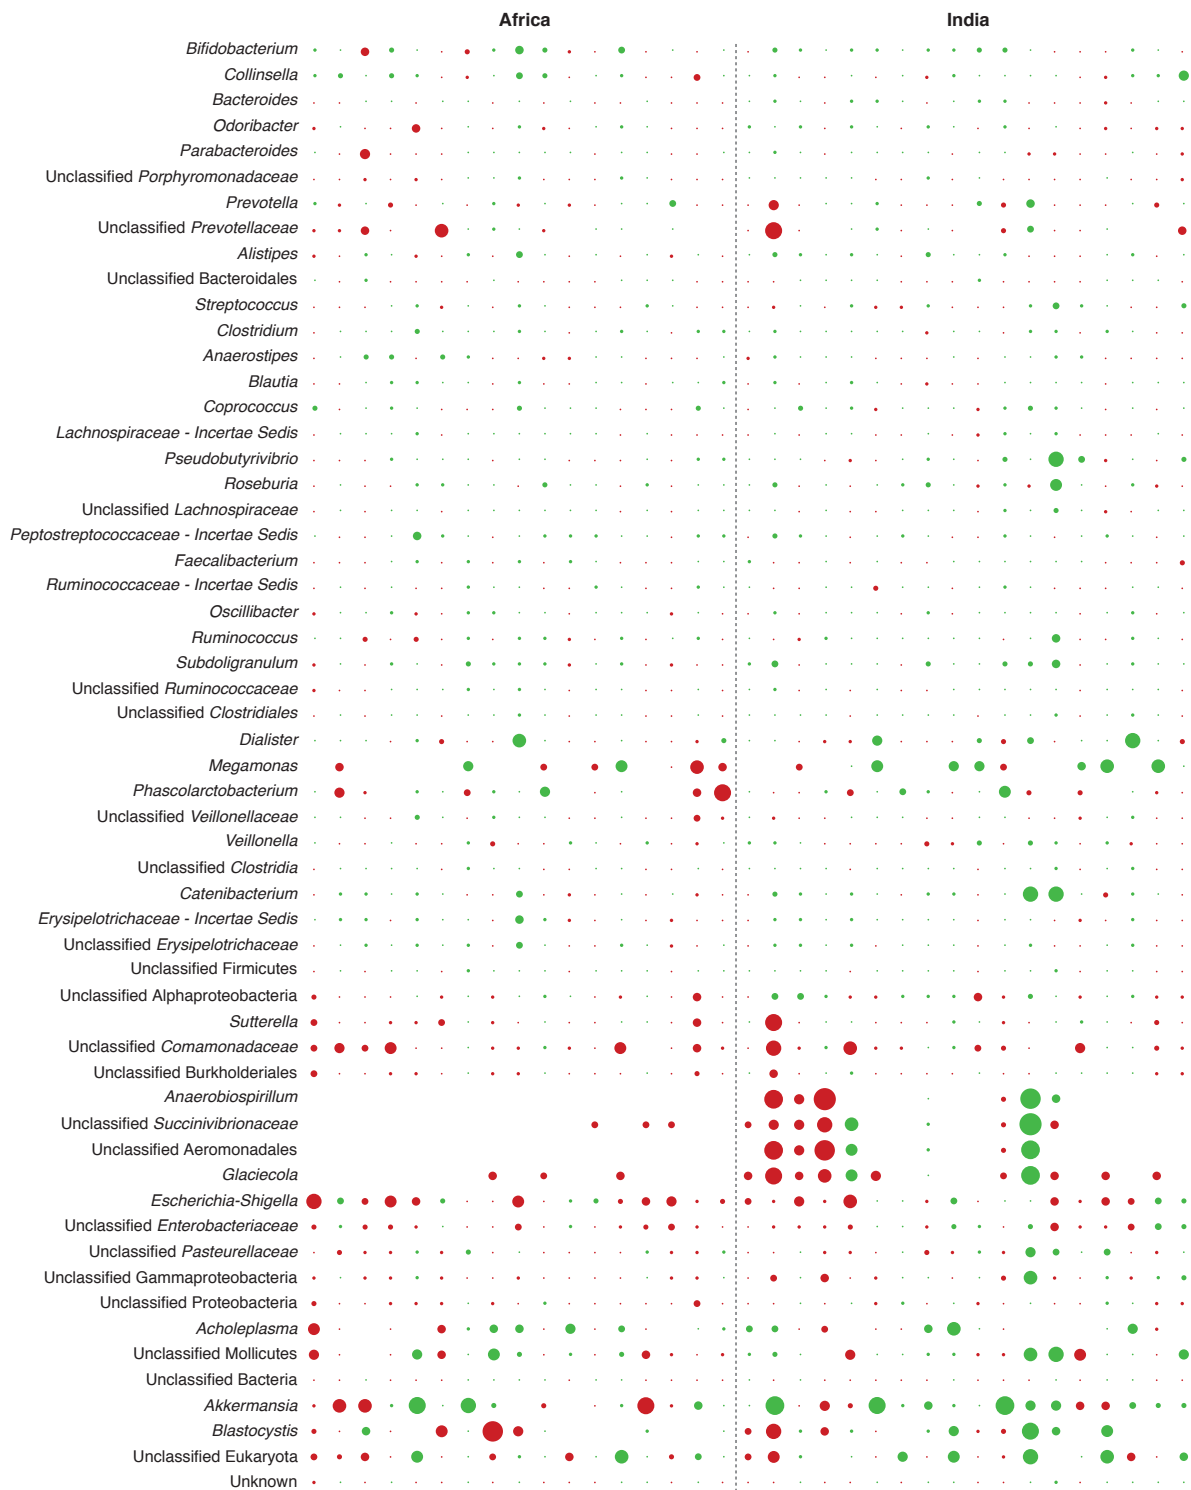

**Figure S4.** Changes of the most abundant genera, for each individual. The diameter of each dot represents the magnitude of change in that individual (log<sub>10</sub> scale). Green color indicates decreases and red color indicates increases.

Table S1. Study subject and travel characteristics

| Region           | Destination | Field of study | Days before departure  | Length of stay            | Days after return        | Sex                   | Age                      | Patient work in hospital | Travellers diarrhoea | Days ill               | Sought medical care | Admitted     | Anti-malarial prophylaxis | Mefloquine     |
|------------------|-------------|----------------|------------------------|---------------------------|--------------------------|-----------------------|--------------------------|--------------------------|----------------------|------------------------|---------------------|--------------|---------------------------|----------------|
| Central Africa   | Cameroon    | Medical        | 76                     | 49                        | 16                       | Female                | 23                       |                          |                      |                        |                     |              |                           | x              |
|                  | Cameroon    | Medical        | 3                      | 29                        | 39                       | Male                  | 25                       | x                        | x                    | 3                      |                     |              |                           | x              |
|                  | Cameroon    | Medical        | 3                      | 30                        | 38                       | Male                  | 28                       | x                        | x                    | 2                      |                     |              |                           | x              |
|                  | Cameroon    | Medical        | 69                     | 49                        | 31                       | Female                | 23                       |                          | x                    | N/A                    |                     |              |                           | x              |
|                  | Cameroon    | Medical        | 19                     | 34                        | 18                       | Female                | 24                       | x                        |                      |                        |                     |              | x                         | x              |
|                  | Cameroon    | Medical        | 0                      | 37                        | 35                       | Female                | 25                       |                          | x                    | 3                      |                     |              |                           | x              |
|                  | Cameroon    | Medical        | 41                     | 34                        | 16                       | Female                | 25                       | x                        | x                    | 6                      |                     |              |                           | x              |
|                  | Cameroon    | Medical        | 25                     | 34                        | 18                       | Female                | 28                       | x                        | x                    | 4                      |                     |              |                           | x              |
|                  | Cameroon    | Medical        | 11                     | 33                        | 13                       | Male                  | 25                       | x                        | x                    | 1                      |                     |              |                           | x              |
|                  | Ethiopia    | Medical        | 0                      | 150                       | 11                       | Female                | 28                       | x                        | x                    | 4                      |                     |              |                           | x              |
| Ethiopia         | Dentistry   | 16             | 32                     | 51                        | Female                   | 24                    |                          | x                        | 6                    |                        | x                   |              | x                         | x              |
| Kenya            | Medical     | 3              | 19                     | 61                        | Female                   | 28                    |                          |                          |                      |                        |                     |              | x                         |                |
| Tanzania         | Medical     | 0              | 31                     | 21                        | Female                   | 24                    | x                        |                          |                      | 12                     |                     |              | x                         |                |
| Tanzania         | Nursing     | 18             | 47                     | 32                        | Male                     | 25                    | x                        |                          |                      |                        |                     |              |                           | x              |
| Rwanda           | Medical     | 2              | 22                     | 25                        | Female                   | 25                    | x                        |                          | x                    | 15                     |                     |              | x                         |                |
| Rwanda           | Medical     | 2              | 22                     | 73                        | Female                   | 25                    | x                        |                          | x                    | 1                      |                     |              | x                         |                |
| Rwanda           | Medical     | 2              | 21                     | 41                        | Female                   | 26                    |                          |                          |                      |                        |                     |              | x                         |                |
|                  |             |                | Range 0-76<br>Median 3 | Range 19-150<br>Median 33 | Range 11-73<br>Median 31 | 76% female<br>(13/17) | Range 23-28<br>Median 25 | 65%<br>(11/17)           | 71%<br>(12/17)       | Range 1-15<br>Median 4 | 6%<br>(1/17)        | 0%<br>0      | 41%<br>(7/17)             | 65%<br>(11/17) |
| Indian peninsula | India       | Medical        | 2                      | 36                        | 5                        | Male                  | 24                       | x                        | x                    | 5                      |                     |              |                           |                |
|                  | India       | Medical        | 15                     | 33                        | 21                       | Female                | 26                       | x                        |                      |                        |                     |              | x                         |                |
|                  | India       | Medical        | 10                     | 29                        | 19                       | Female                | 25                       | x                        | x                    | 2                      |                     |              | x                         |                |
|                  | India       | Medical        | 23                     | 29                        | 44                       | Female                | 25                       | x                        | x                    | 3                      |                     |              |                           |                |
|                  | India       | Medical        | 4                      | 98                        | 25                       | Male                  | 23                       |                          | x                    | 1                      |                     |              |                           |                |
|                  | India       | Medical        | 1                      | 38                        | 2                        | Female                | 29                       | x                        | x                    | 5                      |                     |              | x                         |                |
|                  | India       | Medical        | 0                      | 119                       | 22                       | Female                | 23                       | x                        | x                    | 7                      |                     |              | x                         |                |
|                  | India       | Medical        | 77                     | 106                       | 20                       | Female                | 23                       | x                        | x                    | 5                      |                     |              |                           |                |
|                  | India       | Medical        | 10                     | 40                        | 120                      | Female                | 22                       |                          | x                    | 1                      |                     | x            |                           | x              |
|                  | India       | Medical        | 0                      | 105                       | 19                       | Female                | 23                       |                          | x                    | 2                      |                     | x            |                           | x              |
| India            | Medical     | 16             | 32                     | 20                        | Male                     | 24                    |                          | x                        | 5                    |                        | x                   |              |                           |                |
| India            | Medical     | 1              | 43                     | 25                        | Female                   | 27                    |                          | x                        | 1                    |                        |                     |              |                           |                |
| India            | Midwife     | 7              | 58                     | 32                        | Female                   | 28                    |                          | x                        |                      |                        |                     |              |                           |                |
| India            | Medical     | 4              | 53                     | 12                        | Male                     | 26                    |                          |                          |                      |                        |                     |              |                           |                |
| Sri Lanka        | Medical     | 7              | 23                     | 47                        | Female                   | 34                    |                          |                          |                      |                        |                     |              | x                         |                |
| Sri Lanka        | Medical     | 9              | 24                     | 25                        | Female                   | 24                    |                          | x                        |                      |                        |                     |              |                           | x              |
| Nepal            | Medical     | 4              | 14                     | 4                         | Male                     | 28                    |                          | x                        |                      |                        |                     |              |                           |                |
| Nepal            | Medical     | 4              | 14                     | 4                         | Female                   | 29                    |                          | x                        | x                    | 11                     |                     |              |                           |                |
|                  |             |                | Range 0-77<br>Median 6 | Range 14-119<br>Median 37 | Range 2-120<br>Median 21 | 72% female<br>(13/18) | Range 23-34<br>Median 25 | 67%<br>(12/18)           | 67%<br>(12/18)       | Range 1-7<br>Median 4  | 11%<br>(2/18)       | 6%<br>(1/18) | 28%<br>(5/18)             | 22%<br>(4/18)  |

Table S2. Details of the individual sequencing libraries

| Location data   |             | SSU sequences identified by Metaxa2 |          |             |           |              |         |                          |                        |                       |                   | Library sizes                   |  |  |  |
|-----------------|-------------|-------------------------------------|----------|-------------|-----------|--------------|---------|--------------------------|------------------------|-----------------------|-------------------|---------------------------------|--|--|--|
| Before or after | Destination | Archaea                             | Bacteria | Chloroplast | Eukaryota | Mitochondria | Unknown | Raw library size (reads) | Raw library size (Gbp) | Quality-filtered size | Low quality reads | Bacterial 16S per million reads |  |  |  |
| Before          | Cameroon    | 0                                   | 220,291  | 22          | 157       | 9            | 433     | 125,907,692              | 25.18                  | 116,985,641           | 8,922,051         | 1,883.06                        |  |  |  |
| Before          | Cameroon    | 23                                  | 121,442  | 47          | 141       | 97           | 929     | 78,430,878               | 15.69                  | 70,967,328            | 7,463,550         | 1,711.24                        |  |  |  |
| Before          | Cameroon    | 0                                   | 182,229  | 16          | 24        | 23           | 506     | 110,624,462              | 22.12                  | 102,862,162           | 7,762,300         | 1,771.58                        |  |  |  |
| Before          | Cameroon    | 0                                   | 203,600  | 157         | 703       | 38           | 1,010   | 138,278,024              | 27.66                  | 129,038,382           | 9,239,642         | 1,577.83                        |  |  |  |
| Before          | Cameroon    | 0                                   | 189,107  | 40          | 97        | 20           | 265     | 97,108,136               | 19.42                  | 84,768,485            | 12,339,651        | 2,230.86                        |  |  |  |
| Before          | Cameroon    | 0                                   | 208,475  | 231         | 394       | 45           | 585     | 105,488,039              | 21.10                  | 96,338,305            | 9,149,734         | 2,163.99                        |  |  |  |
| Before          | Cameroon    | 15                                  | 217,277  | 1,113       | 515       | 38           | 1,947   | 94,583,689               | 18.92                  | 86,709,535            | 7,874,154         | 2,505.80                        |  |  |  |
| Before          | Cameroon    | 0                                   | 112,218  | 8           | 217       | 4            | 578     | 57,708,298               | 11.54                  | 55,274,739            | 2,433,559         | 2,030.19                        |  |  |  |
| Before          | Cameroon    | 0                                   | 199,666  | 54          | 141       | 20           | 429     | 93,610,789               | 18.72                  | 80,289,041            | 13,321,748        | 2,486.84                        |  |  |  |
| Before          | Ethiopia    | 0                                   | 198,146  | 394         | 513       | 22           | 1,480   | 114,623,643              | 22.92                  | 107,097,525           | 7,526,118         | 1,850.15                        |  |  |  |
| Before          | Ethiopia    | 0                                   | 208,188  | 355         | 1         | 2            | 576     | 96,158,167               | 19.23                  | 94,094,185            | 2,063,982         | 2,212.55                        |  |  |  |
| Before          | Kenya       | 17                                  | 222,448  | 44          | 71        | 36           | 1,858   | 152,444,626              | 30.49                  | 143,428,931           | 9,015,695         | 1,590.93                        |  |  |  |
| Before          | Tanzania    | 0                                   | 184,030  | 19          | 433       | 4            | 596     | 94,496,474               | 18.90                  | 91,204,324            | 3,292,150         | 2,017.78                        |  |  |  |
| Before          | Tanzania    | 84                                  | 363,035  | 88          | 2,734     | 80           | 2,848   | 186,020,932              | 37.20                  | 178,004,607           | 8,016,325         | 2,039.47                        |  |  |  |
| Before          | Rwanda      | 0                                   | 136,406  | 177         | 9         | 1            | 1,635   | 79,870,933               | 15.97                  | 73,992,049            | 5,878,884         | 1,843.52                        |  |  |  |
| Before          | Rwanda      | 0                                   | 111,466  | 21          | 2,103     | 184          | 496     | 58,683,097               | 11.74                  | 56,688,930            | 1,994,167         | 1,966.27                        |  |  |  |
| Before          | Rwanda      | 2                                   | 248,514  | 1           | 12        | 0            | 1,140   | 116,336,923              | 23.27                  | 112,218,587           | 4,118,336         | 2,214.55                        |  |  |  |
| Before          | India       | 0                                   | 164,203  | 74          | 100       | 16           | 1,907   | 94,168,067               | 18.83                  | 86,725,925            | 7,442,142         | 1,893.36                        |  |  |  |
| Before          | India       | 0                                   | 213,993  | 83          | 6         | 1            | 530     | 125,452,729              | 25.09                  | 120,493,836           | 4,958,893         | 1,775.97                        |  |  |  |
| Before          | India       | 9                                   | 123,055  | 166         | 4,387     | 151          | 1,116   | 81,137,887               | 16.23                  | 77,796,173            | 3,341,714         | 1,581.76                        |  |  |  |
| Before          | India       | 0                                   | 219,475  | 6           | 7         | 4            | 529     | 105,390,115              | 21.08                  | 99,898,565            | 5,491,550         | 2,196.98                        |  |  |  |
| Before          | India       | 12                                  | 108,377  | 1           | 192       | 7            | 487     | 68,826,005               | 13.77                  | 65,736,512            | 3,089,493         | 1,648.66                        |  |  |  |
| Before          | India       | 0                                   | 187,490  | 159         | 4,177     | 97           | 2,485   | 126,672,111              | 25.33                  | 117,356,765           | 9,315,346         | 1,597.61                        |  |  |  |
| Before          | India       | 16                                  | 215,319  | 56          | 197       | 24           | 1,051   | 114,873,991              | 22.97                  | 110,841,646           | 4,032,345         | 1,942.58                        |  |  |  |
| Before          | India       | 0                                   | 191,903  | 37          | 157       | 41           | 744     | 108,862,964              | 21.77                  | 100,505,030           | 8,357,934         | 1,909.39                        |  |  |  |
| Before          | India       | 224                                 | 152,457  | 140         | 2,199     | 143          | 1,277   | 89,041,296               | 17.81                  | 84,176,188            | 4,865,108         | 1,811.17                        |  |  |  |
| Before          | India       | 0                                   | 180,204  | 335         | 2,298     | 72           | 1,200   | 104,860,302              | 20.97                  | 97,572,943            | 7,287,359         | 1,846.86                        |  |  |  |
| Before          | India       | 0                                   | 144,228  | 36          | 269       | 68           | 554     | 119,776,667              | 23.96                  | 111,456,534           | 8,320,133         | 1,294.03                        |  |  |  |
| Before          | India       | 0                                   | 154,785  | 32          | 334       | 67           | 410     | 108,484,366              | 21.70                  | 102,117,614           | 6,366,752         | 1,515.75                        |  |  |  |
| Before          | India       | 0                                   | 164,743  | 8           | 29        | 13           | 499     | 108,191,129              | 21.64                  | 98,753,669            | 9,437,460         | 1,668.22                        |  |  |  |
| Before          | India       | 1                                   | 200,324  | 114         | 821       | 52           | 913     | 120,944,486              | 24.19                  | 111,299,634           | 9,644,852         | 1,799.86                        |  |  |  |
| Before          | Sri Lanka   | 146                                 | 137,803  | 214         | 13        | 4            | 2,439   | 101,623,663              | 20.32                  | 97,424,636            | 4,199,027         | 1,414.46                        |  |  |  |
| Before          | Sri Lanka   | 0                                   | 196,377  | 24          | 109       | 0            | 1,423   | 180,821,242              | 36.16                  | 168,578,941           | 12,242,301        | 1,164.90                        |  |  |  |
| Before          | Nepal       | 11                                  | 100,230  | 198         | 9,846     | 251          | 2,677   | 81,153,547               | 16.23                  | 75,267,243            | 5,886,304         | 1,331.65                        |  |  |  |
| Before          | Nepal       | 0                                   | 141,454  | 18          | 8         | 0            | 1,292   | 97,563,912               | 19.51                  | 91,026,911            | 6,537,001         | 1,553.98                        |  |  |  |
| After           | Cameroon    | 5                                   | 112,023  | 169         | 1,382     | 239          | 857     | 68,589,271               | 13.72                  | 64,867,085            | 3,722,186         | 1,726.96                        |  |  |  |
| After           | Cameroon    | 2                                   | 160,097  | 70          | 275       | 32           | 1,169   | 92,482,953               | 18.50                  | 85,135,965            | 7,346,988         | 1,880.49                        |  |  |  |
| After           | Cameroon    | 0                                   | 149,056  | 21          | 15        | 12           | 513     | 95,181,317               | 19.04                  | 80,837,880            | 14,343,437        | 1,843.89                        |  |  |  |

|       |           |     |         |       |       |     |       |             |       |             |             |          |
|-------|-----------|-----|---------|-------|-------|-----|-------|-------------|-------|-------------|-------------|----------|
| After | Cameroon  | 0   | 182,566 | 71    | 719   | 46  | 760   | 108,827,882 | 21.77 | 94,736,141  | 14,091,741  | 1,927.10 |
| After | Cameroon  | 0   | 157,990 | 10    | 5     | 2   | 310   | 112,558,957 | 22.51 | 105,987,973 | 6,570,984   | 1,490.64 |
| After | Cameroon  | 0   | 185,416 | 27    | 557   | 62  | 914   | 113,933,461 | 22.79 | 105,653,830 | 8,279,631   | 1,754.94 |
| After | Cameroon  | 6   | 215,167 | 312   | 376   | 24  | 1,047 | 74,880,136  | 14.98 | 71,943,878  | 2,936,258   | 2,990.76 |
| After | Cameroon  | 0   | 206,543 | 372   | 6,979 | 630 | 1,179 | 127,104,270 | 25.42 | 119,741,546 | 7,362,724   | 1,724.91 |
| After | Cameroon  | 0   | 264,177 | 7     | 24    | 15  | 558   | 138,551,617 | 27.71 | 124,497,835 | 14,053,782  | 2,121.94 |
| After | Ethiopia  | 0   | 258,280 | 45    | 218   | 20  | 2,127 | 148,483,688 | 29.70 | 139,510,543 | 8,973,145   | 1,851.33 |
| After | Ethiopia  | 0   | 54,397  | 294   | 42    | 2   | 287   | 82,739,446  | 16.55 | 40,538,343  | 42,201,103  | 1,341.87 |
| After | Kenya     | 20  | 168,496 | 10    | 191   | 18  | 1,348 | 118,039,879 | 23.61 | 110,534,095 | 7,505,784   | 1,524.38 |
| After | Tanzania  | 0   | 264,522 | 59    | 86    | 80  | 690   | 132,336,558 | 26.45 | 127,715,066 | 4,521,492   | 2,071.19 |
| After | Tanzania  | 8   | 100,527 | 160   | 420   | 30  | 798   | 463,791,736 | 92.76 | 54,987,641  | 408,804,095 | 1,828.17 |
| After | Rwanda    | 0   | 243,606 | 352   | 1     | 2   | 1,885 | 137,856,261 | 27.57 | 127,235,892 | 10,620,369  | 1,914.60 |
| After | Rwanda    | 0   | 204,169 | 31    | 1,718 | 243 | 865   | 98,323,380  | 19.66 | 92,301,898  | 6,021,482   | 2,211.97 |
| After | Rwanda    | 14  | 169,981 | 102   | 111   | 20  | 1,267 | 108,508,604 | 21.70 | 103,146,520 | 5,362,084   | 1,647.96 |
| After | India     | 0   | 308,378 | 152   | 5,518 | 131 | 3,696 | 172,298,973 | 34.46 | 164,171,030 | 8,127,943   | 1,878.39 |
| After | India     | 0   | 213,865 | 46    | 244   | 30  | 600   | 95,916,677  | 19.18 | 92,069,410  | 3,847,267   | 2,322.87 |
| After | India     | 1   | 271,377 | 35    | 3,645 | 226 | 1,820 | 145,856,676 | 29.17 | 139,769,906 | 6,086,770   | 1,941.60 |
| After | India     | 0   | 156,408 | 4     | 5     | 7   | 598   | 80,858,580  | 16.17 | 77,801,453  | 3,057,127   | 2,010.35 |
| After | India     | 0   | 186,891 | 13    | 79    | 7   | 1,271 | 103,809,366 | 20.76 | 95,299,798  | 8,509,568   | 1,961.08 |
| After | India     | 0   | 196,638 | 143   | 5,629 | 140 | 2,428 | 119,333,838 | 23.87 | 111,437,652 | 7,896,186   | 1,764.56 |
| After | India     | 0   | 142,048 | 37    | 26    | 6   | 1,494 | 79,961,086  | 15.99 | 74,749,858  | 5,211,228   | 1,900.31 |
| After | India     | 0   | 191,360 | 16    | 324   | 277 | 585   | 114,439,546 | 22.89 | 80,387,488  | 34,052,058  | 2,380.47 |
| After | India     | 6   | 123,942 | 42    | 66    | 47  | 621   | 78,223,579  | 15.64 | 75,053,057  | 3,170,522   | 1,651.39 |
| After | India     | 0   | 208,535 | 1,555 | 8,091 | 178 | 2,001 | 103,437,332 | 20.69 | 94,520,827  | 8,916,505   | 2,206.23 |
| After | India     | 0   | 228,654 | 191   | 2,104 | 466 | 1,308 | 109,989,613 | 22.00 | 102,842,328 | 7,147,285   | 2,223.35 |
| After | India     | 0   | 131,170 | 6     | 1     | 10  | 158   | 70,806,355  | 14.16 | 68,666,720  | 2,139,635   | 1,910.24 |
| After | India     | 0   | 96,110  | 2     | 28    | 3   | 91    | 77,982,751  | 15.60 | 75,870,339  | 2,112,412   | 1,266.77 |
| After | India     | 197 | 137,542 | 47    | 105   | 81  | 838   | 101,742,471 | 20.35 | 89,404,424  | 12,338,047  | 1,538.42 |
| After | Sri Lanka | 35  | 163,143 | 301   | 5     | 6   | 2,155 | 101,637,724 | 20.33 | 97,729,754  | 3,907,970   | 1,669.33 |
| After | Sri Lanka | 0   | 108,658 | 53    | 32    | 7   | 663   | 85,438,843  | 17.09 | 81,634,162  | 3,804,681   | 1,331.04 |
| After | Nepal     | 35  | 221,127 | 157   | 137   | 24  | 2,394 | 136,599,459 | 27.32 | 125,704,413 | 10,895,046  | 1,759.10 |
| After | Nepal     | 0   | 93,541  | 22    | 21    | 3   | 567   | 58,982,996  | 11.80 | 51,705,957  | 7,277,039   | 1,809.10 |





**Table S4.** Beta-lactam resistance genes found in the genomes of ESBL-producing *E. coli*

| <b>Individual</b>      | <b>CTX-M</b> | <b>OXA-1</b> | <b>SHV</b> | <b>TEM</b> |
|------------------------|--------------|--------------|------------|------------|
| <b>103</b>             | x            | x            | x          |            |
| <b>107</b>             | x            | x            |            | x          |
| <b>120</b>             | x            | x            |            |            |
| <b>139</b>             | x            | x            |            | x          |
| <b>147</b>             | x            |              |            | x          |
| <b>154</b>             | x            | x            |            | x          |
| <b>155</b>             | x            |              |            |            |
| <b>170</b>             | x            |              |            | x          |
| <b>176</b>             | x            | x            | x          | x          |
| <b>177</b>             | x            |              |            | x          |
| <b>183</b>             | x            |              |            | x          |
| <b>184</b>             | x            | x            |            | x          |
| <b>211<sup>a</sup></b> | x            | x            |            | x          |

<sup>a</sup> Individual 211 had ESBL-producing *E. coli* before travel, but not after.

**Table S5.** Resistance genes included in the Resqu database

| <b>Gene family</b> | <b>Classification</b>  | <b>Resistance</b> |
|--------------------|------------------------|-------------------|
| ACC                | Ambler class C         | Beta-lactam       |
| CTX-M              | Ambler class A         | Beta-lactam       |
| CAR                | Ambler class A         | Beta-lactam       |
| OXA-63             | Ambler class D         | Beta-lactam       |
| OXA-62             | Ambler class D         | Beta-lactam       |
| PER                | Ambler class A         | Beta-lactam       |
| OXA-60             | Ambler class D         | Beta-lactam       |
| ACT                | Ambler class C         | Beta-lactam       |
| SME                | Ambler class A         | Beta-lactam       |
| MIR                | Ambler class C         | Beta-lactam       |
| GES                | Ambler class A         | Beta-lactam       |
| TEM                | Ambler class A         | Beta-lactam       |
| CMY1               | Ambler class C         | Beta-lactam       |
| OXA-55             | Ambler class D         | Beta-lactam       |
| NDM                | Ambler class B         | Beta-lactam       |
| OXA-50             | Ambler class D         | Beta-lactam       |
| OXA-51             | Ambler class D         | Beta-lactam       |
| CMY2               | Ambler class C         | Beta-lactam       |
| OXA-10             | Ambler class D         | Beta-lactam       |
| FOX                | Ambler class C         | Beta-lactam       |
| OXA-58             | Ambler class D         | Beta-lactam       |
| OXA-48             | Ambler class D         | Beta-lactam       |
| SHV                | Ambler class A         | Beta-lactam       |
| OXA-1              | Ambler class D         | Beta-lactam       |
| OXA-2              | Ambler class D         | Beta-lactam       |
| KPC                | Ambler class A         | Beta-lactam       |
| VEB                | Ambler class A         | Beta-lactam       |
| DHA                | Ambler class C         | Beta-lactam       |
| IND                | Ambler class B         | Beta-lactam       |
| MOX                | Ambler class C         | Beta-lactam       |
| IMP                | Ambler class B         | Beta-lactam       |
| CFE                | Ambler class C         | Beta-lactam       |
| CAR (RTG)          | Ambler class A         | Beta-lactam       |
| VIM                | Ambler class B         | Beta-lactam       |
| OXA-23             | Ambler class D         | Beta-lactam       |
| OXA-20             | Ambler class D         | Beta-lactam       |
| OXA-24             | Ambler class D         | Beta-lactam       |
| LAT                | Ambler class C         | Beta-lactam       |
| aac(6')-Ig         | acetyltransferase      | Aminoglycoside    |
| aac(6')-If         | acetyltransferase      | Aminoglycoside    |
| aac(6')-Ia         | acetyltransferase      | Aminoglycoside    |
| aac(6')-Ic         | acetyltransferase      | Aminoglycoside    |
| aac(6')-Ib         | acetyltransferase      | Aminoglycoside    |
| aac(6')-Im         | acetyltransferase      | Aminoglycoside    |
| aac(6')-Il         | acetyltransferase      | Aminoglycoside    |
| aph(6)-Ia          | phosphotransferase     | Aminoglycoside    |
| ant(6)-Ib          | nucleotidyltransferase | Aminoglycoside    |
| aac(6')-Ii         | acetyltransferase      | Aminoglycoside    |
| aph(6)-Ib          | phosphotransferase     | Aminoglycoside    |

|                  |                        |                |
|------------------|------------------------|----------------|
| aac(6')-Ik       | acetyltransferase      | Aminoglycoside |
| aac(6')-Ij       | acetyltransferase      | Aminoglycoside |
| ant(9)-Ib        | nucleotidyltransferase | Aminoglycoside |
| ant(6)-Ia        | nucleotidyltransferase | Aminoglycoside |
| aac(6')-Ir       | acetyltransferase      | Aminoglycoside |
| aac(6')-IIa      | acetyltransferase      | Aminoglycoside |
| aac(6')-29a/29b  | acetyltransferase      | Aminoglycoside |
| aac(6')-IIc      | acetyltransferase      | Aminoglycoside |
| aac(3)-Ie        | acetyltransferase      | Aminoglycoside |
| aac(3)-Ib        | acetyltransferase      | Aminoglycoside |
| aac(3)-Ic        | acetyltransferase      | Aminoglycoside |
| aac(3)-Ia        | acetyltransferase      | Aminoglycoside |
| aac(2')-Ia       | acetyltransferase      | Aminoglycoside |
| ant(3'')-Ia      | nucleotidyltransferase | Aminoglycoside |
| aac(2')-Ic       | acetyltransferase      | Aminoglycoside |
| aac(6')-IIb      | acetyltransferase      | Aminoglycoside |
| aph(3')-Vc       | phosphotransferase     | Aminoglycoside |
| aac(6')-32       | acetyltransferase      | Aminoglycoside |
| aac(3)-VIa       | acetyltransferase      | Aminoglycoside |
| aph(3')-Vb       | phosphotransferase     | Aminoglycoside |
| aac(6')-Iai      | acetyltransferase      | Aminoglycoside |
| aph(3')-VIIa     | phosphotransferase     | Aminoglycoside |
| aac(3)-IXa       | acetyltransferase      | Aminoglycoside |
| aph(4)-Ia        | phosphotransferase     | Aminoglycoside |
| aph(3')-VIa      | phosphotransferase     | Aminoglycoside |
| aph(4)-Ib        | phosphotransferase     | Aminoglycoside |
| aac(3)-IIIb/IIIc | acetyltransferase      | Aminoglycoside |
| aph(3'')-Ic      | phosphotransferase     | Aminoglycoside |
| aac(6')-sk       | acetyltransferase      | Aminoglycoside |
| ant(4')-Ia       | nucleotidyltransferase | Aminoglycoside |
| aph(6)-Id        | phosphotransferase     | Aminoglycoside |
| aac(6')-Iae      | acetyltransferase      | Aminoglycoside |
| aac(6')-Iad      | acetyltransferase      | Aminoglycoside |
| aph(3')-IIa      | phosphotransferase     | Aminoglycoside |
| aac(3)-IVa       | acetyltransferase      | Aminoglycoside |
| aph(6)-Ic        | phosphotransferase     | Aminoglycoside |
| aph(3')-Va       | phosphotransferase     | Aminoglycoside |
| ant(4')-IIa      | nucleotidyltransferase | Aminoglycoside |
| aph(3')-IIb      | phosphotransferase     | Aminoglycoside |
| ant(4')-IIb      | nucleotidyltransferase | Aminoglycoside |
| aph(9)-Ia        | phosphotransferase     | Aminoglycoside |
| aac(3)-IIb       | acetyltransferase      | Aminoglycoside |
| aac(2')-Ib       | acetyltransferase      | Aminoglycoside |
| aac(6')-Iy/z/aa  | acetyltransferase      | Aminoglycoside |
| aph(3'')-Ib      | phosphotransferase     | Aminoglycoside |
| aph(3')-IVa      | phosphotransferase     | Aminoglycoside |
| aac(3)-IIa/IIc   | acetyltransferase      | Aminoglycoside |
| aac(2')-Id       | acetyltransferase      | Aminoglycoside |
| aac(3)-VIIIa     | acetyltransferase      | Aminoglycoside |
| aac(6')-Ip/q/af  | acetyltransferase      | Aminoglycoside |
| aac(3)-VIIa      | acetyltransferase      | Aminoglycoside |
| aph(3'')-Ia      | phosphotransferase     | Aminoglycoside |

|                           |                                     |                |
|---------------------------|-------------------------------------|----------------|
| ant(9)-Ia                 | nucleotidyltransferase              | Aminoglycoside |
| aph(3')-IIIa              | phosphotransferase                  | Aminoglycoside |
| aac(3)-Xa                 | acetyltransferase                   | Aminoglycoside |
| aph(9)-Ib                 | phosphotransferase                  | Aminoglycoside |
| aac(6')-Iid               | acetyltransferase                   | Aminoglycoside |
| aac(6')-Iih               | acetyltransferase                   | Aminoglycoside |
| aph(2'')-Ie/IVa           | phosphotransferase                  | Aminoglycoside |
| aac(3)-IIIa               | acetyltransferase                   | Aminoglycoside |
| aph(2'')-IIIa             | phosphotransferase                  | Aminoglycoside |
| aph(3')-Ib                | phosphotransferase                  | Aminoglycoside |
| aph(2'')-IIa              | phosphotransferase                  | Aminoglycoside |
| aph(3')-Ia                | phosphotransferase                  | Aminoglycoside |
| aac(6')-33/130            | acetyltransferase                   | Aminoglycoside |
| aac(6')-Ih/Is/Iu/Iv/Iw/Ix | acetyltransferase                   | Aminoglycoside |
| ant(2'')-Ia               | nucleotidyltransferase              | Aminoglycoside |
| qnrC                      | pentapeptide repeat protein class C | Quinolone      |
| qnrB                      | pentapeptide repeat protein class B | Quinolone      |
| qnrA                      | pentapeptide repeat protein class A | Quinolone      |
| qnrS                      | pentapeptide repeat protein class S | Quinolone      |
| qnrD                      | pentapeptide repeat protein class D | Quinolone      |
| smr/qac/abr               | efflux pump                         | Multidrug      |
| qacAB                     | efflux pump                         | Multidrug      |
| nhsA                      | methyltransferase                   | Thiostrepton   |
| tsnRA                     | methyltransferase                   | Thiostrepton   |
| tsnRB                     | methyltransferase                   | Thiostrepton   |
| catA1                     | acetyltransferase                   | Amphenicol     |
| catA2                     | acetyltransferase                   | Amphenicol     |
| catA3                     | acetyltransferase                   | Amphenicol     |
| catA4                     | acetyltransferase                   | Amphenicol     |
| catA5                     | acetyltransferase                   | Amphenicol     |
| catA6                     | acetyltransferase                   | Amphenicol     |
| catA7/catA8               | acetyltransferase                   | Amphenicol     |
| catA9                     | acetyltransferase                   | Amphenicol     |
| catA10                    | acetyltransferase                   | Amphenicol     |
| catA11                    | acetyltransferase                   | Amphenicol     |
| catA12                    | acetyltransferase                   | Amphenicol     |
| catA13                    | acetyltransferase                   | Amphenicol     |
| catA15                    | acetyltransferase                   | Amphenicol     |
| catA16                    | acetyltransferase                   | Amphenicol     |
| catB1                     | acetyltransferase                   | Amphenicol     |
| catB2/catB3/catB10        | acetyltransferase                   | Amphenicol     |
| catB7                     | acetyltransferase                   | Amphenicol     |
| catB9                     | acetyltransferase                   | Amphenicol     |
| cmlA                      | efflux pump                         | Amphenicol     |
| cml-II                    | efflux pump                         | Amphenicol     |
| floR                      | efflux pump                         | Amphenicol     |
| fexA                      | efflux pump                         | Amphenicol     |
| cml-III                   | efflux pump                         | Amphenicol     |
| cmlv                      | efflux pump                         | Amphenicol     |
| cmrA                      | efflux pump                         | Amphenicol     |
| cmr-II                    | efflux pump                         | Amphenicol     |
| pexA                      | efflux pump                         | Amphenicol     |

|               |               |           |
|---------------|---------------|-----------|
| erm(A)        | methylase     | Macrolide |
| erm(B)        | methylase     | Macrolide |
| erm(C)        | methylase     | Macrolide |
| erm(D)        | methylase     | Macrolide |
| erm(E)        | methylase     | Macrolide |
| erm(F)        | methylase     | Macrolide |
| erm(G)        | methylase     | Macrolide |
| erm(H)        | methylase     | Macrolide |
| erm(N)        | methylase     | Macrolide |
| erm(O)        | methylase     | Macrolide |
| erm(Q)        | methylase     | Macrolide |
| erm(R)        | methylase     | Macrolide |
| erm(S)        | methylase     | Macrolide |
| erm(T)        | methylase     | Macrolide |
| erm(U)        | methylase     | Macrolide |
| erm(V)        | methylase     | Macrolide |
| erm(W)        | methylase     | Macrolide |
| erm(X)        | methylase     | Macrolide |
| erm(Y)        | methylase     | Macrolide |
| erm(Z)        | methylase     | Macrolide |
| erm(30)       | methylase     | Macrolide |
| erm(31)       | methylase     | Macrolide |
| erm(32)       | methylase     | Macrolide |
| erm(33)       | methylase     | Macrolide |
| erm(34)       | methylase     | Macrolide |
| erm(35)       | methylase     | Macrolide |
| erm(36)       | methylase     | Macrolide |
| erm(41)       | methylase     | Macrolide |
| erm(42)       | methylase     | Macrolide |
| cfr           | methylase     | Macrolide |
| msr(A)        | efflux pump   | Macrolide |
| vga(A)        | efflux pump   | Macrolide |
| vga(B)        | efflux pump   | Macrolide |
| vga(C)        | efflux pump   | Macrolide |
| ere(A)/ere(C) | esterase      | Macrolide |
| ere(B)        | esterase      | Macrolide |
| vgb(A)        | lyase         | Macrolide |
| vgb(B)        | lyase         | Macrolide |
| lnu(A)        | transferase   | Macrolide |
| lnu(B)        | transferase   | Macrolide |
| lnu(C)        | transferase   | Macrolide |
| lnu(D)        | transferase   | Macrolide |
| lnu(F)        | transferase   | Macrolide |
| vat(A)        | transferase   | Macrolide |
| vat(B)        | transferase   | Macrolide |
| vat(C)        | transferase   | Macrolide |
| vat(D)        | transferase   | Macrolide |
| vat(E)        | transferase   | Macrolide |
| vat(F)        | transferase   | Macrolide |
| vat(G)        | transferase   | Macrolide |
| mph(A)        | phosphorylase | Macrolide |
| mph(B)        | phosphorylase | Macrolide |

|                            |                                      |              |
|----------------------------|--------------------------------------|--------------|
| mph(C)                     | phosphorylase                        | Macrolide    |
| mph(E)                     | phosphorylase                        | Macrolide    |
| cmr                        | NA                                   | Macrolide    |
| mdt(A)                     | efflux pump                          | Macrolide    |
| qepA                       | efflux pump                          | quinolone    |
| sul1                       | dihydropteroate synthetase inhibitor | sulfonamide  |
| sul2                       | dihydropteroate synthetase inhibitor | sulfonamide  |
| sul3                       | dihydropteroate synthetase inhibitor | sulfonamide  |
| otr(A)                     |                                      | Tetracycline |
| tetB(P)                    |                                      | Tetracycline |
| tet(M)                     |                                      | Tetracycline |
| tet(O)                     |                                      | Tetracycline |
| tet(Q)                     |                                      | Tetracycline |
| tet(S)                     |                                      | Tetracycline |
| tet(T)                     |                                      | Tetracycline |
| tet(W)                     |                                      | Tetracycline |
| tet(32)                    |                                      | Tetracycline |
| tet(36)                    |                                      | Tetracycline |
| tet(44)                    |                                      | Tetracycline |
| otr(B)                     | efflux pump                          | Tetracycline |
| otr(C)                     | efflux pump                          | Tetracycline |
| tcr                        | efflux pump                          | Tetracycline |
| tet(A)                     | efflux pump                          | Tetracycline |
| tetA(P)                    | efflux pump                          | Tetracycline |
| tet(B)                     | efflux pump                          | Tetracycline |
| tet(C)                     | efflux pump                          | Tetracycline |
| tet(D)                     | efflux pump                          | Tetracycline |
| tet(E)                     | efflux pump                          | Tetracycline |
| tet(G)                     | efflux pump                          | Tetracycline |
| tet(H)                     | efflux pump                          | Tetracycline |
| tet(J)                     | efflux pump                          | Tetracycline |
| tet(K)                     | efflux pump                          | Tetracycline |
| tet(L)                     | efflux pump                          | Tetracycline |
| tet(V)                     | efflux pump                          | Tetracycline |
| tet(Y)                     | efflux pump                          | Tetracycline |
| tet(Z)                     | efflux pump                          | Tetracycline |
| tet(30)                    | efflux pump                          | Tetracycline |
| tet(31)                    | efflux pump                          | Tetracycline |
| tet(33)                    | efflux pump                          | Tetracycline |
| tet(39)                    | efflux pump                          | Tetracycline |
| tet(40)                    | efflux pump                          | Tetracycline |
| tet(41)                    | efflux pump                          | Tetracycline |
| tet(42)                    | efflux pump                          | Tetracycline |
| tet(43)                    | efflux pump                          | Tetracycline |
| tet(X)                     |                                      | Tetracycline |
| tet(34)                    |                                      | Tetracycline |
| tet(37)                    |                                      | Tetracycline |
| tet(U)                     |                                      | Tetracycline |
| dfrA1/dfrA15               | dihydrofolate reductase              | Sufonamide   |
| dfrA3                      | dihydrofolate reductase              | Sufonamide   |
| dfrA5/dfrA14/dfrA25/dfrA30 | dihydrofolate reductase              | Sufonamide   |
| dfrA6/dfrA31               | dihydrofolate reductase              | Sufonamide   |

|                                    |                                          |              |
|------------------------------------|------------------------------------------|--------------|
| dfrA7/dfrA17/dfrA32                | dihydrofolate reductase                  | Sulfonamide  |
| dfrA8                              | dihydrofolate reductase                  | Sulfonamide  |
| dfrA9                              | dihydrofolate reductase                  | Sulfonamide  |
| dfrA10                             | dihydrofolate reductase                  | Sulfonamide  |
| dfrA12/dfrA13/dfrA21/dfrA22/dfrA33 | dihydrofolate reductase                  | Sulfonamide  |
| dfrA16                             | dihydrofolate reductase                  | Sulfonamide  |
| dfrA18                             | dihydrofolate reductase                  | Sulfonamide  |
| dfrA20                             | dihydrofolate reductase                  | Sulfonamide  |
| dfrA23                             | dihydrofolate reductase                  | Sulfonamide  |
| dfrA24                             | dihydrofolate reductase                  | Sulfonamide  |
| dfrA26                             | dihydrofolate reductase                  | Sulfonamide  |
| dfrA27/dfrA28                      | dihydrofolate reductase                  | Sulfonamide  |
| dfrB1/dfrB5/dfrB6/dfrB8            | dihydrofolate reductase                  | Sulfonamide  |
| dfrB2/dfrB3/dfrB7                  | dihydrofolate reductase                  | Sulfonamide  |
| dfrB4                              | dihydrofolate reductase                  | Sulfonamide  |
| dfrC                               | dihydrofolate reductase                  | Sulfonamide  |
| dfrD                               | dihydrofolate reductase                  | Sulfonamide  |
| dfrG                               | dihydrofolate reductase                  | Sulfonamide  |
| dfrK                               | dihydrofolate reductase                  | Sulfonamide  |
| vanA                               | ligase of type A                         | Glycopeptide |
| vanRA                              | transcriptional regulator of type A      | Glycopeptide |
| vanSA                              | histidine protein kinase of type A       | Glycopeptide |
| vanHA                              | dehydrogenase of type A                  | Glycopeptide |
| vanXA                              | dipeptidase of type A                    | Glycopeptide |
| vanYA                              | carboxypeptidase of type A               | Glycopeptide |
| vanZA                              | teicoplanin resistance protein of type A | Glycopeptide |
| vanB                               | ligase of type B                         | Glycopeptide |
| vanXB                              | dipeptidase of type B                    | Glycopeptide |
| vanHB                              | dehydrogenase of type B                  | Glycopeptide |
| vanWB                              | glycopeptide resistance gene of type B   | Glycopeptide |
| vanYB                              | carboxypeptidase of type B               | Glycopeptide |
| vanSB                              | transcriptional regulator of type B      | Glycopeptide |
| vanRB                              | histidine protein kinase of type B       | Glycopeptide |
| vanD                               | ligase of type D                         | Glycopeptide |
| vanXD                              | dipeptidase of type D                    | Glycopeptide |
| vanHD                              | dehydrogenase of type D                  | Glycopeptide |
| vanYD                              | carboxypeptidase of type D               | Glycopeptide |
| vanSD                              | transcriptional regulator of type D      | Glycopeptide |
| vanRD                              | histidine protein kinase of type D       | Glycopeptide |
| vanG                               | ligase of type D                         | Glycopeptide |
| vanXYG                             | dipeptidase/carboxypeptidase of type G   | Glycopeptide |
| vanWG                              | glycopeptide resistance gene of type G   | Glycopeptide |
| vanYG                              | carboxypeptidase of type G               | Glycopeptide |
| vanSG                              | transcriptional regulator of type G      | Glycopeptide |
| vanRG                              | histidine protein kinase of type G       | Glycopeptide |
| vanTG                              | serine racemase of type G                | Glycopeptide |
| vanE                               | ligase of type E                         | Glycopeptide |
| vanXYE                             | dipeptidase/carboxypeptidase of type E   | Glycopeptide |
| vanTE                              | serine racemase of type E                | Glycopeptide |
| vanRE                              | transcriptional regulator of type E      | Glycopeptide |
| vanSE                              | histidine protein kinase of type E       | Glycopeptide |
| vanL                               | ligase of type type L                    | Glycopeptide |

|        |                                          |              |
|--------|------------------------------------------|--------------|
| vanXYL | dipeptidase/carboxypeptidase of type L   | Glycopeptide |
| vanTmL | serine racemase of type L                | Glycopeptide |
| vanTrL | serine racemase of type L                | Glycopeptide |
| vanRL  | transcriptional regulator of type L      | Glycopeptide |
| vanSL  | histidine protein kinase of type L       | Glycopeptide |
| vanM   | ligase of type M                         | Glycopeptide |
| vanXM  | dipeptidase of type M                    | Glycopeptide |
| vanHM  | dehydrogenase of type M                  | Glycopeptide |
| vanYM  | carboxypeptidase of type M               | Glycopeptide |
| vanSM  | histidine protein kinase of type M       | Glycopeptide |
| vanRM  | transcriptional regulator of type M      | Glycopeptide |
| vanN   | ligase of type N                         | Glycopeptide |
| vanXYN | dipeptidase/carboxypeptidase of type N   | Glycopeptide |
| vanTN  | serine racemase of type N                | Glycopeptide |
| vanRN  | transcriptional regulator of type N      | Glycopeptide |
| vanSN  | histidine protein kinase of type N       | Glycopeptide |
| intI9  | Integron-associated integrase (class 9)  |              |
| intI8  | Integron-associated integrase (class 8)  |              |
| intI7  | Integron-associated integrase (class 7)  |              |
| intI6  | Integron-associated integrase (class 6)  |              |
| intI1  | Integron-associated integrase (class 1)  |              |
| intI3  | Integron-associated integrase (class 3)  |              |
| intI2  | Integron-associated integrase (class 2)  |              |
| intI10 | Integron-associated integrase (class 10) |              |
| ISCR8  | ISCR transposase                         |              |
| ISCR3  | ISCR transposase                         |              |
| ISCR4  | ISCR transposase                         |              |
| ISCR5  | ISCR transposase                         |              |
| ISCR14 | ISCR transposase                         |              |
| ISCR7  | ISCR transposase                         |              |
| ISCR1  | ISCR transposase                         |              |
| ISCR2  | ISCR transposase                         |              |
| ISCR6  | ISCR transposase                         |              |

Version 1.1; <http://www.1928diagnostics.com/resdb>
